# Supplementary material for: Evaluation of the Effect of Andrographolide on Atherosclerotic Rabbits Induced byPorphyromonas gingivalis
Source: Hindawi journal article supplement (doi:10.1155/2014/724718), 2014-01-01
Supplement: f1 [file 724718.f1.pdf]

### Maximum Tolerated Dose (MTD) of AND on rabbits

**Table S1:** Maximum tolerated dose of AND based on body weight effect of male rabbit.

| Animal groups   | Duration of treatment (Week) |      |      |      |      | Weight Gain/Loss (g) |
|-----------------|------------------------------|------|------|------|------|----------------------|
|                 | 0                            | 1    | 2    | 3    | 4    |                      |
| Control         | 3040                         | 3080 | 3130 | 3230 | 3395 | 355 ± 63.522         |
| AND (50 mg/kg)  | 3110                         | 3255 | 3330 | 3375 | 3450 | 340 ± 57.909         |
| AND (100 mg/kg) | 3100                         | 3180 | 3235 | 3300 | 3365 | 265 ± 46.027         |
| AND (500 mg/kg) | 3155                         | 3180 | 3250 | 3315 | 3390 | 235 ± 43.261         |

Values are expressed as mean ± S.E.M. No statistical difference between control and AND treated group ( $p < 0.05$ ).

**Table S2:** Maximum tolerated dose of AND based on body weight effect of female rabbit.

| Animal groups   | Duration of treatment (Week) |      |      |      |      | Weight Gain/Loss (g) |
|-----------------|------------------------------|------|------|------|------|----------------------|
|                 | 0                            | 1    | 2    | 3    | 4    |                      |
| Control         | 3115                         | 3170 | 3245 | 3360 | 3435 | 320 ± 59.097         |
| AND (50 mg/kg)  | 3205                         | 3255 | 3330 | 3455 | 3500 | 295 ± 56.555         |
| AND (100 mg/kg) | 3140                         | 3235 | 3380 | 3440 | 3505 | 365 ± 67.026         |
| AND (500 mg/kg) | 3105                         | 3125 | 3205 | 3315 | 3476 | 371 ± 68.506         |

Values are expressed as mean ± S.E.M. No statistical difference between control and AND treated group ( $p < 0.05$ ).
